# Supplementary material for: Microbe–Immune–Stress Interactions Impact Behaviour during Postnatal Development
Source: MDPI journal article supplement (doi:10.3390/ijms232315064), 2022-12-01
Supplement: s1 [file s1]

## Supplementary Material

### Microbe-immune-stress interactions impact behaviour during postnatal development

Cassandra Francella<sup>1</sup>, Miranda Green<sup>1</sup>, Giorgia Caspani<sup>2</sup>, Jonathan K.Y. Lai<sup>1</sup>, Kelly C. Rilett<sup>1</sup>, Jane A. Foster<sup>1, 3</sup>

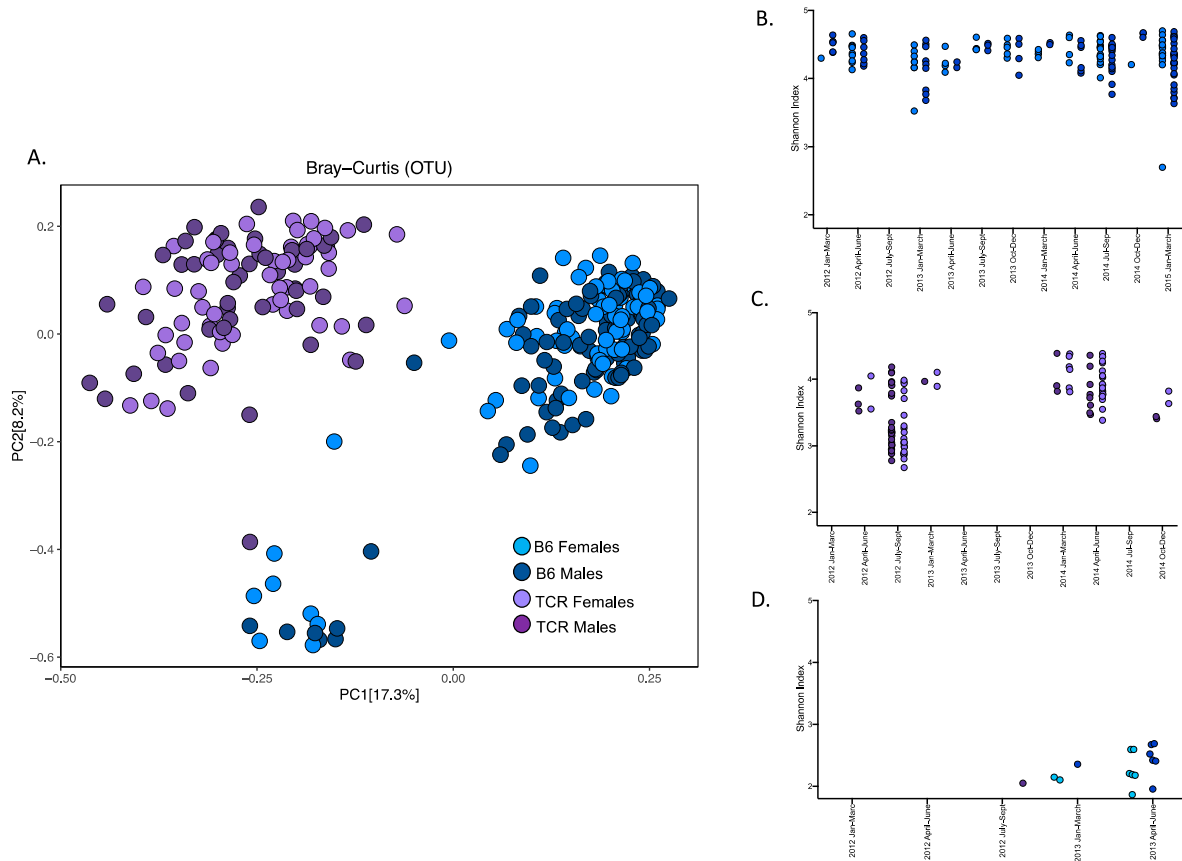

Supplemental Figure S1. Principle Component Analysis (PCoA) for Beta-diversity using raw ASV data revealed three individual clusters (A) including two B6 clusters (B, D) and one *TCRβ*<sup>-/-δ</sup><sup>-/-</sup> cluster (C). Analysis of alpha diversity of individual samples showed that samples in the smaller B6 cluster (D) had lower alpha diversity compared to the larger B6 (B) and *TCRβ*<sup>-/-δ</sup><sup>-/-</sup> cluster (C). The demographics of these samples revealed samples from the same litter as well as having similar postnatal days (Supplementary Table S1). Therefore, due to the nature of these samples, they were removed from subsequent analyses.

Supplemental Table S1 – Demographics for samples excluded from analyses

| Sample ID | Counts | Animal ID | LITTER | PO        | GENOTYPE | SEX | Shannon Index |
|-----------|--------|-----------|--------|-----------|----------|-----|---------------|
| JF1419    | 2591   | D76-1     | D76    | 21-Feb-13 | B6       | F   | 2.10          |
| JF1420    | 24724  | D76-2     | D76    | 21-Feb-13 | B6       | M   | 2.36          |
| JF1470    | 59863  | D83-3     | D83    | 19-Apr-13 | B6       | M   | 2.52          |
| JF1475    | 64361  | D84-1     | D84    | 01-May-13 | B6       | F   | 1.87          |
| JF1486    | 64641  | D85-2     | D85    | 10-May-13 | B6       | M   | 2.42          |
| JF1485    | 66697  | D85-1     | D85    | 10-May-13 | B6       | F   | 2.60          |
| JF1303    | 66845  | D53-1     | D53    | 29-Aug-12 | TCR      | M   | 2.05          |
| JF1469    | 71810  | D83-2     | D83    | 19-Apr-13 | B6       | M   | 2.67          |
| JF1478    | 74397  | D84-4     | D84    | 01-May-13 | B6       | M   | 1.96          |
| JF1487    | 75488  | D85-3     | D85    | 10-May-13 | B6       | M   | 2.41          |
| JF1482    | 76491  | D84-8     | D84    | 01-May-13 | B6       | F   | 2.19          |
| JF1472    | 77097  | D83-5     | D83    | 19-Apr-13 | B6       | M   | 2.69          |
| JF1483    | 80036  | D84-9     | D84    | 01-May-13 | B6       | F   | 2.18          |
| JF1476    | 80101  | D84-2     | D84    | 01-May-13 | B6       | F   | 2.21          |
| JF1473    | 80138  | D83-6     | D83    | 19-Apr-13 | B6       | F   | 2.60          |
| JF1414    | 100261 | D75-5     | D75    | 21-Feb-13 | B6       | F   | 2.15          |

**A**

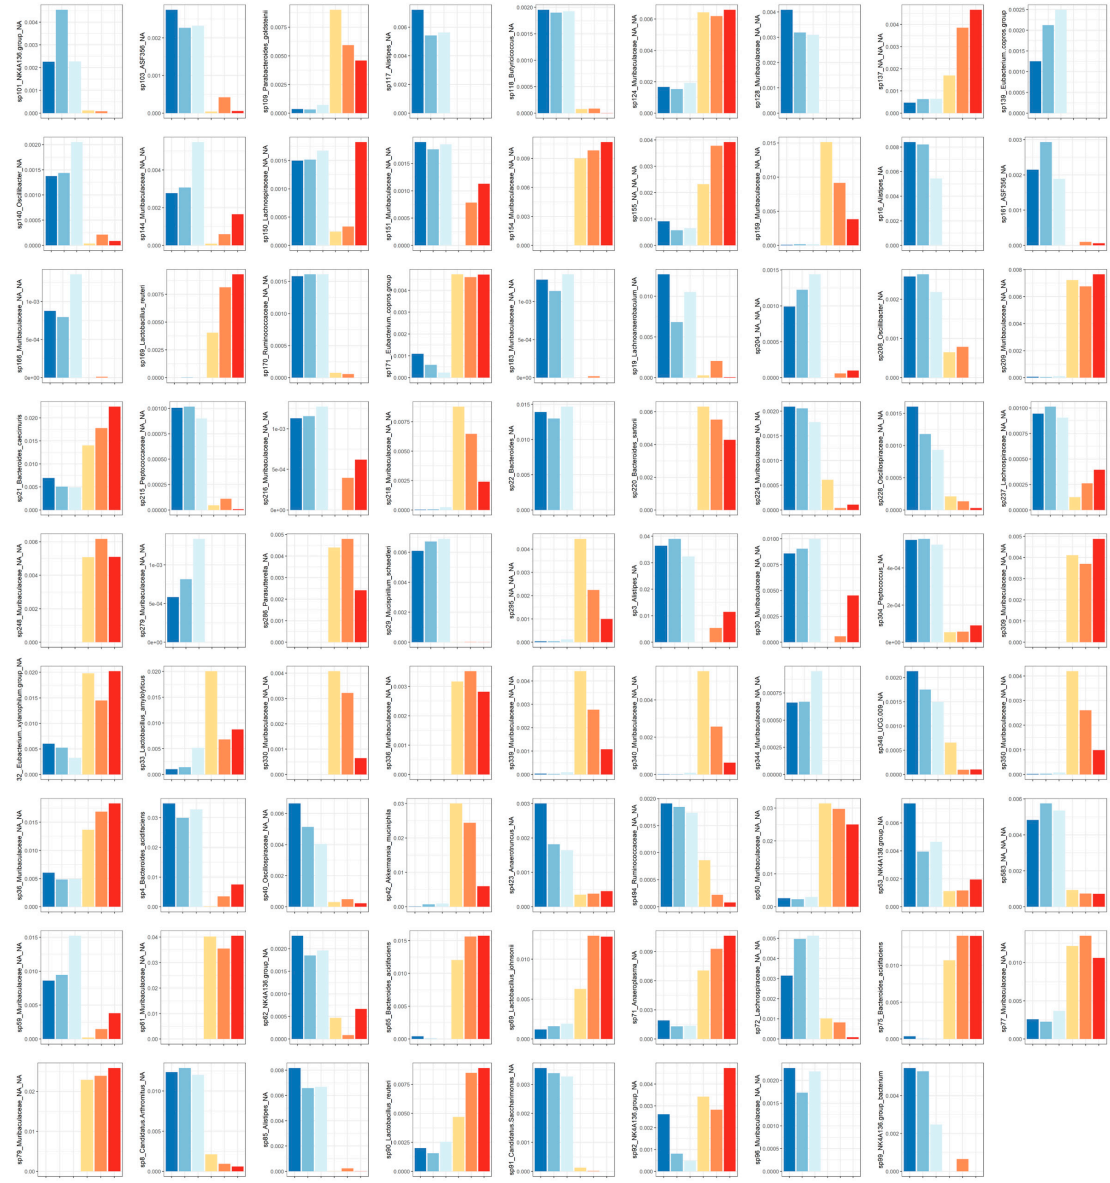

**B**

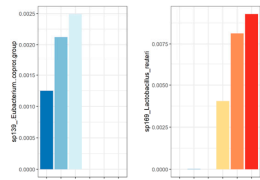

**C**

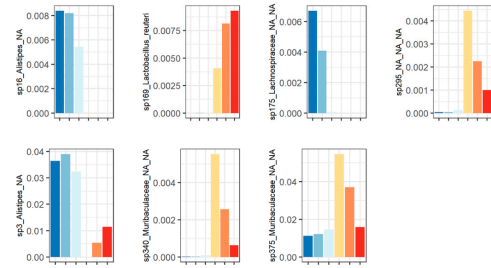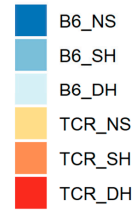

Supplemental Figure S2. Relative abundance of significant consensus taxa from differential abundance analysis using ALDex2 and DESeq2 for (A) Genotype, (B) Stress and (C) Genotype-Stress interaction

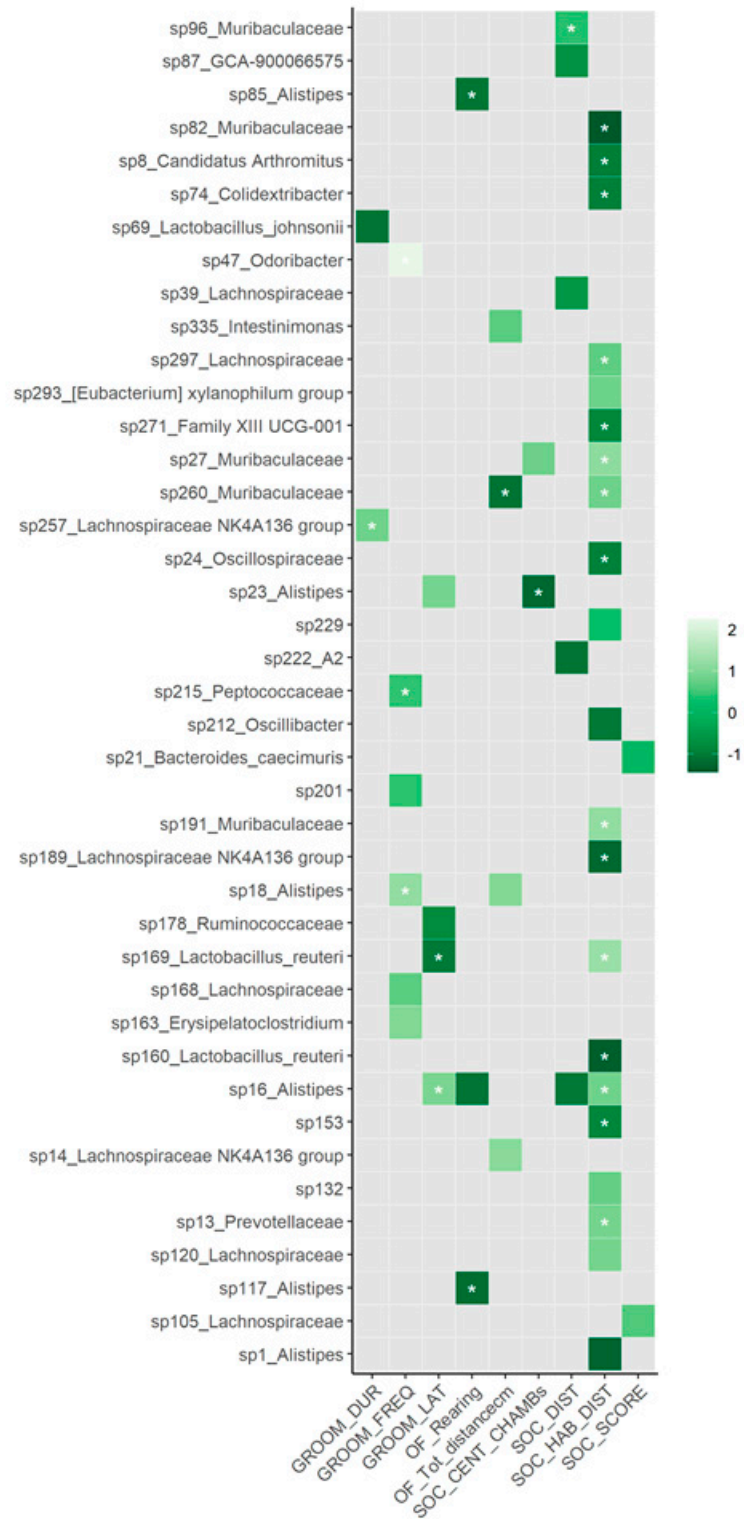

Supplemental Figure S3. MaAsLin2 omnibus associations between behavioural measures (open field, social behaviour and self grooming) and gut microbiota composition at the ASV level in postnatal day 24 (P24) mice. Color scale-bar show scaled correlations between taxa and factors, ranging from the highest (white) to lowest (dark green). Stars indicate significance at  $FDR < 0.05$ .
